# Supplementary material for: Identification of the onchocerciasis vector in the Kakoi-Koda focus of the Democratic Republic of Congo
Source: PubMed Central journal article supplement (PMC9668120; doi:10.1371/journal.pntd.0010684), 2022-11-04
Supplement: pntd.0010684.s001.pdf [file pntd.0010684.s001.pdf]

**PLoSNTDs**

## **Identification of the Onchocerciasis Vector in the Kakoi-Koda Focus of the Democratic Republic of Congo**

By Rory J Post, Anne Laudisoit, Christine Laemmer, Kenneth Pfarr, Achim Hoerauf, Michel Mandro, Pablo Tortosa, Yann Gomard, Tony Ukety, Thomson Lakwo, Claude Mande, Lorne Farovitch, Uche Amazigo, Didier Bakajika, David Oguttu, Naomi Awaca & Robert Colebunders

### **SUPPORTING MATERIAL**

## **S1 Figs: Arial photographs of Kakoi-Koda focus**

(Tony Ukety, 20th April 2022)

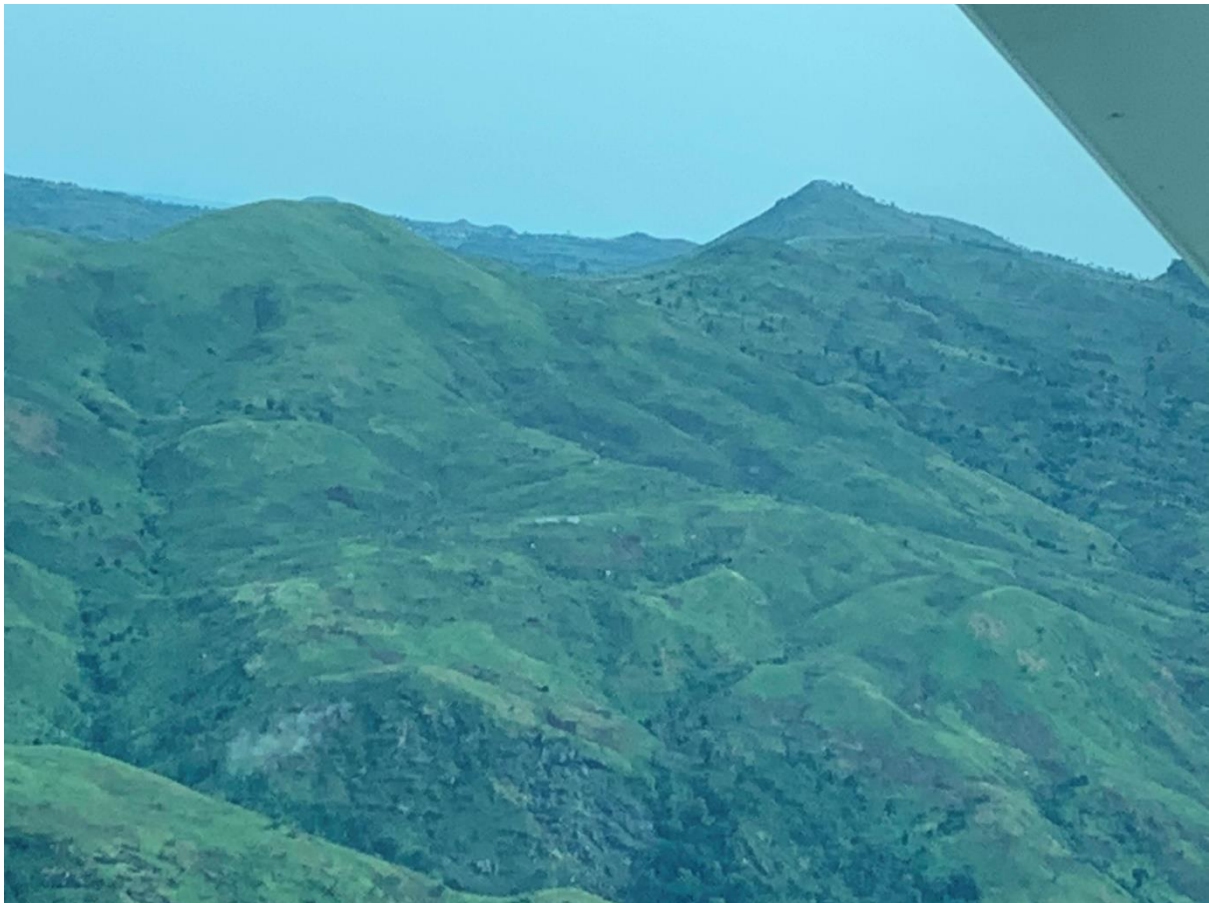

**S1a Fig. Mount Aboro viewed from South-East.**

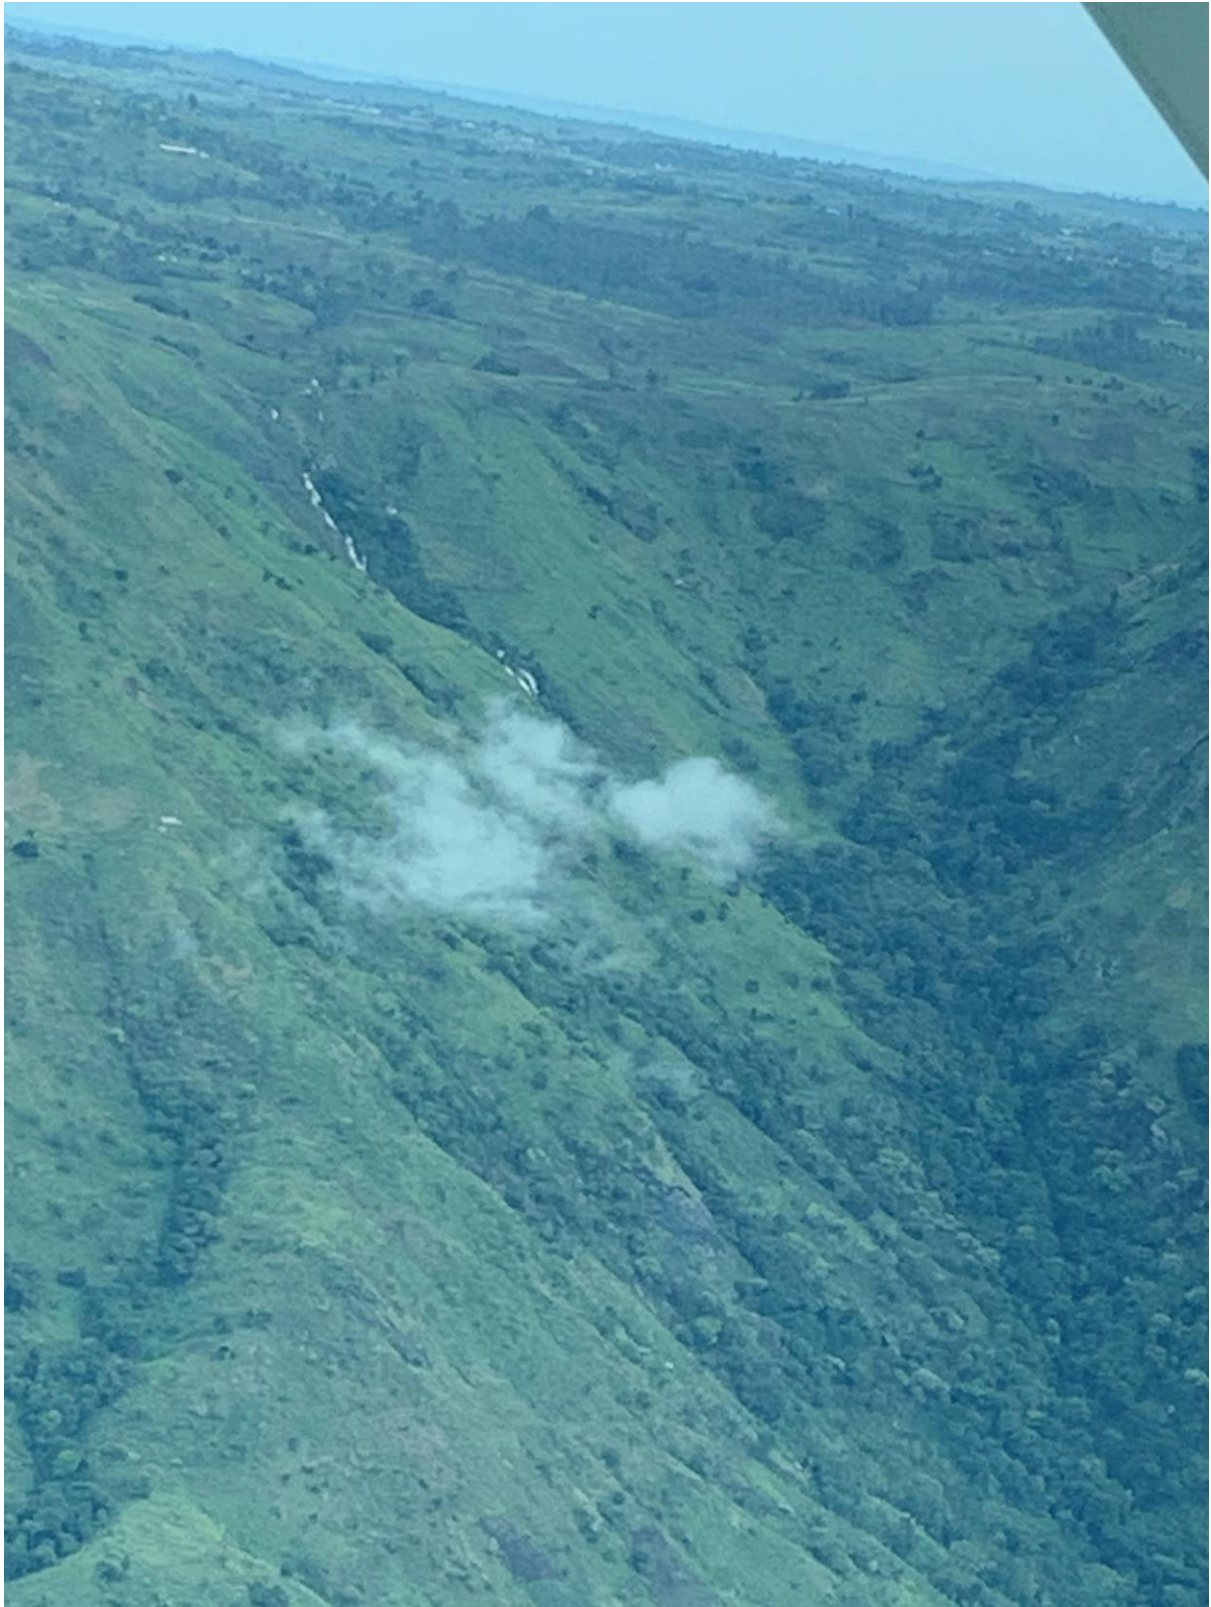

**S1b Fig. Koda river viewed from the East.**
