# Supplementary material for: Identification of the onchocerciasis vector in the Kakoi-Koda focus of the Democratic Republic of Congo
Source: PubMed Central journal article supplement (PMC9668120; doi:10.1371/journal.pntd.0010684), 2022-11-04
Supplement: pntd.0010684.s003.pdf [file pntd.0010684.s003.pdf]

PLoSNTDs

## Identification of the Onchocerciasis Vector in the Kakoi-Koda Focus of the Democratic Republic of Congo

By Rory J Post, Anne Laudisoit, Christine Laemmer, Kenneth Pfarr, Achim Hoerauf, Michel Mandro, Pablo Tortosa, Yann Gomard, Tony Ukety, Thomson Lakwo, Claude Mande, Lorne Farovitch, Uche Amazigo, Didier Bakajika, David Oguttu, Naomi Awaca & Robert Colebunders

### SUPPORTING MATERIAL

## S1 Table: Alphabetical List of Blackfly Species Identified from the Ituri Highlands 2015 to 2018

| Genus           | Subgenus            | Species                   |
|-----------------|---------------------|---------------------------|
| <i>Simulium</i> | <i>Anasolen</i>     | <i>dentulosum</i>         |
|                 | <i>Freemanellum</i> | <i>berghei</i>            |
|                 | <i>Metomphallus</i> | <i>hargreavesi</i>        |
|                 |                     | <i>vorax</i>              |
|                 | <i>Nevermannia</i>  | <i>bwambanum</i>          |
|                 | <i>Pomeroyellum</i> | <i>alcocki</i>            |
|                 |                     | <i>cervicornutum</i>      |
|                 |                     | <i>impukane/ituriense</i> |
|                 |                     | <i>unicornutum</i>        |

(see S2 Table for details, and S4 Table for *S. neavei*)
