# Supplementary material for: Identification of the onchocerciasis vector in the Kakoi-Koda focus of the Democratic Republic of Congo
Source: PubMed Central journal article supplement (PMC9668120; doi:10.1371/journal.pntd.0010684), 2022-11-04
Supplement: pntd.0010684.s004.pdf [file pntd.0010684.s004.pdf]

**PLoSNTDs**

**Identification of the Onchocerciasis Vector in the Kakoi-Koda Focus of the Democratic Republic of Congo**

By Rory J Post, Anne Laudisoit, Christine Laemmer, Kenneth Pfarr, Achim Hoerauf, Michel Mandro, Pablo Tortosa, Yann Gomard, Tony Ukety, Thomson Lakwo, Claude Mande, Lorne Farovitch, Uche Amazigo, Didier Bakajika, David Oguttu, Naomi Awaca & Robert Colebunders

**SUPPORTING MATERIAL**

**S2 Table: List of Species Identified from the Ituri Highlands by Date and Locality**

| Date (D-M-Y) | River* & Locality | Latitude/ Longitude (deg.dec) | Species & Life Stage** |              |                    |                  |                |                      |                           |                    |                |
|--------------|-------------------|-------------------------------|------------------------|--------------|--------------------|------------------|----------------|----------------------|---------------------------|--------------------|----------------|
|              |                   |                               | <i>dentulosum</i>      | <i>vorax</i> | <i>hargreavesi</i> | <i>bwambanum</i> | <i>alcocki</i> | <i>cervicornutum</i> | <i>Impukane/ituriense</i> | <i>unicornutum</i> | <i>berghei</i> |
| <b>2015</b>  |                   |                               |                        |              |                    |                  |                |                      |                           |                    |                |
| 15-08-15     | Koda Lokpa        | N02.01104<br>E30.90872        |                        |              |                    |                  |                |                      |                           |                    | 4 P            |
| 26-09-15     | Koda Bala         | N02.02499<br>E30.90443        | 5 P + 13 L             |              |                    |                  |                |                      |                           |                    |                |
| 23-10-15     | Koda Gono         | N02.01104<br>E30.90872        | 3 P                    |              |                    |                  |                |                      |                           |                    |                |
| 19-10-15     | Kuda Adrasi       | N02.12322<br>E30.96900        |                        | 1 P          |                    |                  |                |                      |                           |                    |                |
| 24-09-15     | Kuda Adrasi       | N02.12322<br>E30.96900        | 3 P + 27 L             | 24 P + 68 L  | 1 L                | 1 L              | 1 P            |                      |                           |                    |                |
| 20-10-15     | Kuda Adrasi       | N02.12322<br>E30.96900        | 7 P                    |              |                    |                  |                |                      |                           |                    |                |
| 23-09-15     | Kuda Ndroi        | N02.10425<br>E30.97488        |                        | 2 P          |                    |                  | 3 P            |                      |                           |                    |                |

|             |                        |                        |            |             |      |     |     |  |     |     |  |
|-------------|------------------------|------------------------|------------|-------------|------|-----|-----|--|-----|-----|--|
| 24-09-15    | Kuda Ndroi             | N02.10425<br>E30.97488 |            |             |      |     |     |  | 1 L |     |  |
| 19-10-15    | Kuda Ndroi             | N02.10425<br>E30.97488 | 1 P + 3 L  | 1 NM        |      |     |     |  |     | 8 P |  |
| 26-10-15    | Kuda Djupacora 1       | N02.11101<br>E30.96219 |            | 1 L + 1 AF  |      | 6 L |     |  |     |     |  |
| 26-09-15    | Madai Bala             | N02.02959<br>E30.90721 | 8 PP       |             |      | 6 P |     |  |     | 3 P |  |
| 26-09-15    | Lodda Zaambi           | N02.04853<br>E30.91453 | 9 P        |             |      |     |     |  |     |     |  |
| Oct 2015    | Lodda Zaambi           | N02.04862<br>E30.91464 | 2 P        |             |      |     |     |  |     |     |  |
| 23-10-15    | Yakpajo Ndroi          | N02.12459<br>E30.98039 |            |             |      | 2 P | 2 P |  |     |     |  |
| 19-10-15    | Muda Adrasi            | N02.09889<br>E30.9736  |            | 1 L         |      |     |     |  |     |     |  |
| 24-10-15    | Yadda Ndeke 3          | N01.97877<br>E30.91766 |            |             | 2 NM |     |     |  |     |     |  |
| 24-10-15    | Gridda Ndeke 3         | N01.98321<br>E30.91695 | 3 P + 2 NM |             |      |     |     |  |     |     |  |
| <b>2016</b> |                        |                        |            |             |      |     |     |  |     |     |  |
| 12-08-16    | Ndeke                  | N01.97887<br>E30.91764 |            |             |      |     |     |  | 5 P |     |  |
| 15-08-16    | Kuda Ndroi             | N02.10404<br>E30.97229 |            | 4 L         |      |     |     |  |     |     |  |
| 18-08-16    | Kuda Kudiwek           | N02.08436<br>E31.00458 |            | 20 L        |      |     |     |  |     |     |  |
| <b>2017</b> |                        |                        |            |             |      |     |     |  |     |     |  |
| 22-08-17    | Awoo Chute Djupudnik   | N02.16494<br>E30.99906 | 1 NM + 9 P | 3 NF + 1 NM |      |     |     |  |     |     |  |
| 22-08-17    | Kulubu (near) Djuparam | N02.10439<br>E31.02308 | 3 AF       | 15 AF       |      |     |     |  |     |     |  |

|              |                                 |                        |             |      |  |      |  |     |  |  |  |
|--------------|---------------------------------|------------------------|-------------|------|--|------|--|-----|--|--|--|
| Oct-Nov 2017 | Djuparam                        | N02.10439<br>E31.02308 | 34 AF       | 1 AF |  |      |  |     |  |  |  |
| 15-08-17     | Kakoi<br>Djupulungo             | N02.09949<br>E31.03542 |             | 12 P |  |      |  |     |  |  |  |
| 18-08-17     | Kakoi<br>Djupuchelo             | N02.12854<br>E31.04591 |             | 12 P |  |      |  |     |  |  |  |
| 16-08-17     | Kuda<br>Djupudero               | N02.09819<br>E30.99144 |             | 60 P |  |      |  |     |  |  |  |
| 16-08-17     | Alakpa<br>Djupudero             | N02.09819<br>E30.99144 |             |      |  | 11 P |  | 5 P |  |  |  |
| 15-08-17     | Kakoi<br>Rima                   | N02.09773<br>E31.03268 |             | 9 L  |  |      |  |     |  |  |  |
| 20-08-17     | Kakoi<br>Rima                   | N02.09773<br>E31.03268 |             | 17 P |  |      |  |     |  |  |  |
| 20-08-17     | Kolubu<br>(near)<br>Uchudi Hill | N02.10351<br>E31.02260 |             | 3 AF |  |      |  |     |  |  |  |
| 21-08-17     | Awoo<br>Pont Awoo               | N02.16813<br>E31.04783 |             | 8 P  |  |      |  |     |  |  |  |
| 21-04-17     | Koda<br>Rassia                  | N02.00021<br>E30.90450 | 5 L + 4 P   |      |  |      |  |     |  |  |  |
| 22-08-17     | Koda<br>Rassia Dam              | N02.00021<br>E30.90450 | 14 P + 3 AF |      |  |      |  |     |  |  |  |
| 20-08-17     | Kulubu<br>(near Camp<br>Uchudi) | N02.10439<br>E31.02308 | 1 AF        |      |  |      |  |     |  |  |  |
| 19-04-17     | Lodda<br>Zaambi                 | N02.04862<br>E30.91464 | 7 L         |      |  |      |  |     |  |  |  |
| <b>2018</b>  |                                 |                        |             |      |  |      |  |     |  |  |  |
| Feb-Mar 2018 | Djuparam                        | N02.10439<br>E31.02308 | 37 AF       | 1 AF |  |      |  |     |  |  |  |
| Mar 2018     | Djuparam                        | N02.10439<br>E31.02308 | 64 AF       | 1 AF |  |      |  |     |  |  |  |
| April 2018   | Djuparam                        | N02.10439<br>E31.02308 | 1 AF        |      |  |      |  |     |  |  |  |

|          |        |                        |       |  |  |  |  |  |  |  |  |
|----------|--------|------------------------|-------|--|--|--|--|--|--|--|--|
| 05-04-18 | Kulubu | N02.09487<br>E31.00255 | 12 AF |  |  |  |  |  |  |  |  |
| 07-04-18 | Kulubu | N02.09487<br>E31.00255 | 5 AF  |  |  |  |  |  |  |  |  |
| 08-04-18 | Dabu   | N02.07365<br>E31.02237 | 2 AF  |  |  |  |  |  |  |  |  |

\*In most cases this is the river from which samples were taken, but for appetitive female adult blackflies (AF from Human Landing Catches) this is the nearest river to the vector collection site (often situated on the bank of the river).

\*\***P**=Pupae; **L**=Larvae; **NF**=Neonate female adult (reared from pupae); **NM**=Neonate male adult (reared from pupae); **AF**=Appetitive female adult (from Human Landing Catch).
