# Supplementary material for: Identification of the onchocerciasis vector in the Kakoi-Koda focus of the Democratic Republic of Congo
Source: PubMed Central journal article supplement (PMC9668120; doi:10.1371/journal.pntd.0010684), 2022-11-04
Supplement: pntd.0010684.s005.pdf [file pntd.0010684.s005.pdf]

## PLoSNTDs

### Identification of the Onchocerciasis Vector in the Kakoi-Koda Focus of the Democratic Republic of Congo

By Rory J Post, Anne Laudisoit, Christine Laemmer, Kenneth Pfarr, Achim Hoerauf, Michel Mandro, Pablo Tortosa, Yann Gomard, Tony Ukety, Thomson Lakwo, Claude Mande, Lorne Farovitch, Uche Amazigo, Didier Bakajika, David Oguttu, Naomi Awaca & Robert Colebunders

## SUPPORTING MATERIAL

### S3 Table: Crab Trapping in the Kakoi-Koda Focus in 2015-2016\*

| River    | Locality  | Lat/long            | Date<br>Day/Month/Year | Number of Crabs |                              |
|----------|-----------|---------------------|------------------------|-----------------|------------------------------|
|          |           |                     |                        | Examined        | Positive<br><i>S. neavei</i> |
| KUDA     | NDROI     | N2.10406 E30.97227  | 24/09/2015             | 18              | 0                            |
| KUDA     | NDROI     | N2.10382 E30.97183  | 24/09/2015             | 8               | 0                            |
| KUDA     | ADRASI    | N2.10439 E30.96429  | 25/09/2015             | 3               | 0                            |
| MUDA     | ADRASI    | N2.09887 E30.97358  | 25/09/2015             | 3               | 0                            |
| KODA     | BALA      | N2.0253 E30.90455   | 26/09/2015             | 0               | 0                            |
| MADAI    | BALA      | N02.02959 E30.90721 | 26/09/2015             | 2               | 0                            |
| LODDA    | ZAAMBI    | N2.04862 E30.91464  | 26/09/2015             | 0               | 0                            |
| RANGUDDA | BALA      | N2.04781 E30.91109  | 26/09/2015             | 8               | 0                            |
| BAIDA    | KER       | N2.03369 E30.92015  | 27/09/2015             | 22              | 0                            |
| BUGUDDA  | NDEKE     | N2.02078 E30.91233  | 27/09/2015             | 0               | 0                            |
| KUDA     | DJUPAKORA | N2.10339 E30.97269  | 08/06/2016             | 16              | 0                            |
| KUDA     | DJUPAKORA | N2.10364 E30.97332  | 08/06/2016             | 4               | 0                            |
| SEPEADDA | NZERKU 3  | N1.94735 E30.9122   | 16/06/2016             | 4               | 0                            |
| KUDA     | DJUPAKORA | N2.10331 E30.97314  | 07/08/2016             | 0               | 0                            |
| MUDA     | MBESI     | N2.10052 E30.97516  | 10/08/2016             | 4               | 0                            |

|              |            |                    |            |           |          |
|--------------|------------|--------------------|------------|-----------|----------|
| AWO          | OKEBOBANDA | N2.17064 E31.04485 | 15/08/2016 | 0         | 0        |
| KAKOI        | OKEBOBANDA | N2.16134 E30.05022 | 15/08/2016 | 0         | 0        |
| KUDA         | SAJU       | N2.10386 E30.98529 | 17/08/2016 | 3         | 0        |
| MUDA         | MBESI      | N2.09915 E30.97378 | 19/08/2016 | 2         | 0        |
| <b>Total</b> |            |                    |            | <b>97</b> | <b>0</b> |

\*See also S4 Table for one site prospected within the focus on 23.x.2009.
