# Supplementary material for: Identification of the onchocerciasis vector in the Kakoi-Koda focus of the Democratic Republic of Congo
Source: PubMed Central journal article supplement (PMC9668120; doi:10.1371/journal.pntd.0010684), 2022-11-04
Supplement: pntd.0010684.s006.pdf [file pntd.0010684.s006.pdf]

**PLoSNTDs**

**Identification of the Onchocerciasis Vector in the Kakoi-Koda Focus of the Democratic Republic of Congo**

By Rory J Post, Anne Laudisoit, Christine Laemmer, Kenneth Pfarr, Achim Hoerauf, Michel Mandro, Pablo Tortosa, Yann Gomard, Tony Ukety, Thomson Lakwo, Claude Mande, Lorne Farovitch, Uche Amazigo, Didier Bakajika, David Oguttu, Naomi Awaca & Robert Colebunders

**SUPPORTING MATERIAL**

**S4 Table: List of Collections of Vectors from outside the Kakoi-Koda focus in 2009 & 2016**

| Country | Date      | River      | Site                 | Lat°N/Long°E<br>(deg.dec) | Crabs Caught |                           | <i>damnosum</i><br>larvae &<br>pupae | Spot HLCs |
|---------|-----------|------------|----------------------|---------------------------|--------------|---------------------------|--------------------------------------|-----------|
|         |           |            |                      |                           | Total        | <i>neavei</i><br>positive |                                      |           |
| Uganda  | 19.x.2009 | Nyadel     | Nyadel village       | 02.4673/31.1638           | 22           | 0                         | 0                                    | 0         |
|         |           | Zingili    | Nyadel village       | 02.4694/31.2358           | 6            | 3                         | 0                                    | 0         |
|         |           | Nyagak     | Paidha               | 02.4271/30.9708           | 42           | 17                        | 0                                    | 0         |
|         | 20.x.2009 | Nyagak     | Akoc village         | 02.4464/30.9326           | 169          | 35                        | 0                                    | 0         |
|         |           | Ayudi      | Ayudi coffee         | 02.4161/30.9599           | 14           | 3                         | 0                                    | 0         |
|         |           | Nyagak     | Nyagale village      | 02.4330/30.9579           | 30           | 9                         | 0                                    | 0         |
| DRC     | 22.x.2009 | Awo        | Gosohi               | 02.2615/30.9397           | 0            | 0                         | 0                                    | 0         |
|         |           | Awo        | Japano village       | 02.1729/31.0368           | 2            | 0                         | 0                                    | 0         |
|         |           | Kakoi      | above Awo confluence | 02.1688/31.4960           | 1            | 0                         | 0                                    | 0         |
|         | 23.x.2009 | Kakoi/Tsha | Zopasonga village*   | 01.6643/31.5342           | 12           | 11                        | 0                                    | 0         |
|         |           | Alla       | Alla village         | 02.1794/31.1523           | 1            | 0                         | 0                                    | 0         |
|         |           | Ori        | Alici village        | 02.1835/31.1511           | 1            | 0                         | 0                                    | 0         |
|         | 24.x.2009 | Omi        | Aduku village        | 02.5719/30.6641           | 4            | 4                         | 0                                    | 0         |

|  |            |        |                         |                 |     |    |   |                  |
|--|------------|--------|-------------------------|-----------------|-----|----|---|------------------|
|  |            | Vida   | Upper Nyagak            | 02.2293/30.8226 | 3   | 0  | 0 | 0                |
|  | 25.x.2009  | Grinju | Bakalu village          | 01.9390/30.5177 | 0   | 0  | 0 | 0                |
|  |            | Avida  | Bunia main bridge       | 01.9532/30.5327 | 76  | 0  | 0 | 0                |
|  | 26.x.2009  | Aoda   | Trib. of Shari          | 02.2408/30.6096 | 140 | 0  | 0 | 0                |
|  | 30.iv.2016 | Aru    | Kakere-Mbaka bridge     | 02.6733/30.5424 | 2   | 0  | 0 | 0                |
|  |            | Omi    | Kuru-kuru 2             | 02.6611/30.5514 | 3   | 2  | 0 | 12 <i>neavei</i> |
|  | 01.v.2016  | Omi    | Azabu village           | 02.5962/30.6339 | 4   | 3  | 0 | 0                |
|  |            | Omi    | Aviri village           | 02.5718/30.6636 | 1   | 1  | 0 | 0                |
|  |            | Dhaka  | Azabu village           | 02.5912/30.6167 | 38  | 1  | 0 | 0                |
|  | 02.v.2016  | Mi     | Mbila-Lubi village      | 02.7714/30.6495 | 0   | 0  | 0 | 0                |
|  |            | Onyi   | Kalia-Gombiri bridge    | 02.8422/30.7814 | 49  | 0  | 0 | 0                |
|  |            | Aru    | Danger (Dibwa bridge)   | 02.7855/30.5880 | 2   | 0  | 0 | 0                |
|  | 03.v.2016  | Mi     | Yomi bridge             | 02.7443/30.7697 | 48  | 47 | 0 | 0                |
|  |            | Mi     | Onvoko-Malinga village  | 02.7218/30.7574 | 53  | 39 | 0 | 0                |
|  |            | Onyi   | Vulo village            | 02.8207/30.8206 | 3   | 0  | 0 | 0                |
|  | 04.v.2016  | Onyi   | Ombienze bridge         | 02.9349/30.6441 | 35  | 0  | 0 | 0                |
|  |            | Aru    | Essebi bridge           | 02.9524/30.6297 | 13  | 0  | 0 | 0                |
|  |            | Aru    | Ova bridge              | 03.0032/30.7476 | 0   | 0  | 0 | 0                |
|  | 05.v.2016  | Aru    | Urua-Araba bridge       | 02.9525/30.7980 | 11  | 0  | 0 | 0                |
|  |            | Aru    | Essefe village          | 02.8570/30.8517 | 3   | 0  | 0 | 0                |
|  |            | Ofo    | Waro bridge             | 02.8860/30.8466 | 4   | 0  | 0 | 0                |
|  | 06.v.2016  | Mi     | Ayuru 1 bridge          | 02.7735/30.6879 | 38  | 37 | 0 | 0                |
|  |            | Ake    | Alivu-Nyoro bridge      | 02.6231/30.6231 | 14  | 9  | 0 | 0                |
|  | 07.v.2016  | Mi     | Yomi-Onvokokakwa bridge | 02.7121/30.7585 | 53  | 21 | 0 | 0                |

\*This site is situated within the Kakoi-Koda focus.
